# Supplementary material
Source: PubMed Central journal article supplement (PMC7783544)
Supplement: jamapediatr-e205026-s001.pdf [file jamapediatr-e205026-s001.pdf]

1           **Primary Care Program Providing Inpatient Consultations for Children with**  
2           **Medical Complexity: a Pilot Randomized Quality Improvement Trial**

3                                   **BACKGROUND AND RATIONALE**

4           Comprehensive care (CC) provided in the High-Risk Children’s Clinic (HRCC) at The  
5           University of Texas at Houston (UTH) McGovern Medical School involves care for acute and  
6           chronic conditions from a team of ethnically diverse pediatricians and nurse practitioners who  
7           are knowledgeable about each patient and highly trained and experienced in treating medically  
8           complex and fragile children. This clinic serves as a novel medical home where both primary  
9           and specialty services are provided in the same place at the same visit. Acute problems  
10          presenting before 4 pm are seen the same day or if they occur over the weekend, on Monday  
11          morning. All parents have the cell phone number to directly reach one of the primary care  
12          clinicians at all hours. Multiple measures are used to promote and ensure the highest quality of  
13          care such as daily checks of emergency department and hospital logs to ensure prompt follow-  
14          up and coordination of care, weekly HRCC provider team meetings to review the care provided  
15          before every ED visit and hospitalization, high priority given to minimizing unnecessary ED visits  
16          and hospitalizations, and a relatively low patient-to-staff ratio of no greater than 100 (to allow  
17          for longer clinic visits, more telephone calls and e-mails, and extensive quality improvement  
18          measures).

19          Comprehensive care undoubtedly increases access to high-quality healthcare for high-  
20          risk disadvantaged chronically ill children. The findings of our previous randomized trial of  
21          comprehensive care vs. usual care that were given accelerated publication in JAMA (2014) have  
22          attracted national attention as the best evidence to date supporting medical homes to reduce  
23          either adverse outcomes or costs. <sup>1</sup> Comprehensive care resulted in major benefits (ED visits,  
24          admissions, hospital days, and pediatric ICU admissions and days were all reduced by 47-69%)  
25          and savings from the health system perspective were >\$10,000/child-year.<sup>1</sup> Indeed, the  
26          improvements in outcomes and reduction in costs exceed those previously reported in prior  
27          studies of medical homes for patients of any age or condition. <sup>1-3</sup> Despite these demonstrated  
28          benefits, high-risk patients seen in the High-Risk Children’s Clinic still experience high rates of

29 morbidity and often require hospitalization for treatment of acute exacerbations of their  
30 underlying chronic conditions. In 2015, a total of 100 HRCC patients experienced 175  
31 admissions at Children’s Memorial Hermann Hospital (**CMHH**) - that serves as the UTH tertiary  
32 teaching hospital - for a mean length of stay of 7.1 days. As a result, a pilot quality  
33 improvement (**QI**) trial will be conducted to assess the impact of offering inpatient consultation  
34 (**IC**) by the HRCC providers at CMHH to further optimize coordination and integration of  
35 inpatient and outpatient care and reduce total hospital days per child-year for the HRCC  
36 patients.

37

38 **Hypotheses:**

39 Primary Hypothesis: We hypothesize that relative to usual inpatient care, the inpatient  
40 consultation service will decrease the total number of hospital days per child-year.

41 Secondary Hypotheses: We hypothesize that relative to usual inpatient care, the inpatient  
42 consultation service will:

- 43 1. Be cost-effective by either decreasing the number of hospital days per child-year without  
44 increasing health system costs, decreasing health system costs without increasing hospital  
45 days, or decreasing both.
- 46 2. Decrease the total number of PICU days per child-year at CMHH.
- 47 3. Decrease the 30-day ER visit rate following CMHH discharge.
- 48 4. Decrease the 30-day re-admission rate following CMHH discharge.
- 49 5. Increase parent/caregiver satisfaction as measured by pre-selected Hospital CAHPS survey  
50 questions, which will be administered to the parent/caregiver 5-10 days after discharge  
51 from the CMHH by study personnel who are not involved with the clinical care of patients.<sup>4</sup>
- 52 6. Increase the rate of inpatient consultations with the CMHH inpatient physician team during  
53 admission - i.e. face-to-face consultations, non-face-to-face consultations, or a phone call  
54 to the inpatient physician team.

- 55 7. Increase the rate of follow-up phone calls from HRCC providers to parents/caregivers  
56 within 36 hours after discharge from CMHH.
- 57 8. Increasing the rate of follow-up clinic visits in the High-Risk Children’s Clinic within 5-10  
58 days after discharge from CMHH.
- 59 9. Decrease the rate of serious illnesses (death, hospitalization > 7 days, or PICU admission)  
60 during the study period.

61

62

## METHODS

63 **Setting.** The High-Risk Children’s Clinic of the UTH is a patient-centered medical home for CMC.  
64 Children who require hospital care in our center are usually treated at Children’s Memorial  
65 Hermann Hospital (CMHH), a private institution adjacent to our medical school that serves as  
66 the UTH tertiary teaching hospital.

67 **Inclusion/Exclusion criteria.** HRCC patients who require admission to CMHH will be included in  
68 the pilot trial. HRCC patients  $\geq 18$  years of age at study initiation will be excluded from the pilot  
69 trial and so will those with a Do-Not-Resuscitate (DNR) order, unrepaired congenital heart  
70 disease, active cancer, mitochondrial disorder, or seen in the HRCC clinic solely for  
71 compassionate care.

72 **Design.** All eligible HRCC patients will be randomized to either comprehensive care with usual  
73 inpatient care or comprehensive care augmented with inpatient consultation utilizing a  
74 computer-generated algorithm with variable block sizes. Patients will be stratified by assigned  
75 provider and baseline clinical risk (high risk if  $\leq$  expected median risk or very high risk if  $>$   
76 expected median risk, as judged by the clinic’s medical director [R. Mosquera] based on  
77 diagnoses and prior clinical course).

78

79 **Treatment Groups.**

80 **Comprehensive Care with Usual Inpatient Care.** Includes comprehensive outpatient care in the

81 HRCC and usual inpatient care provided by the CMHH hospital inpatient team (residents,  
82 fellows, and attending faculty physicians) with usual occasional communication with HRCC  
83 providers. This care will not be modified by the study protocol.

84 **Comprehensive care Augmented with Inpatient Consultation.** Includes comprehensive  
85 outpatient care in the HRCC and inpatient consultation by HRCC providers during admissions at  
86 CMHH. The HRCC providers will review the inpatient care plan and make treatment and  
87 discharge recommendations to the hospital inpatient team with a focus on coordination and  
88 integration of inpatient and outpatient care. The inpatient consultations will consist of either  
89 face-to-face consultations, non-face-to-face consultations, or a phone call to the inpatient  
90 physicians at a minimum on admission and at discharge, including during observation stays.

91 **Enrollment period.** Enrollment will occur between October 3, 2016 and October 2, 2019 and  
92 outcome evaluations will continue through either October 2, 2017 or 30 days after discharge  
93 from last admission by October 2, 2017 (whichever comes later).

94 **Data Collection and Management.** Research Electronic Data Capture (REDCap) software will be  
95 utilized to collect and manage predefined study variable data. REDCap is a secure, web-based  
96 application designed to support electronic data capture for research studies providing: 1) an  
97 intuitive interface for validated data entry; 2) audit trails for tracking data manipulation and  
98 export procedures; 3) automated export procedures for seamless data downloads to common  
99 statistical packages; and 4) procedures for importing data from external sources.

100 **Cost Assessment.** The incremental costs of comprehensive care with inpatient consultation vs.  
101 comprehensive care with usual inpatient care will be assessed from the health system  
102 perspective. Hospital costs for inpatient services will be obtained from the Memorial Hermann  
103 Hospital institutional accounting system. Costs for professional services provided during CMHH  
104 hospitalizations will be assessed based on Relative Value Units (RVUs) using UT Health claims  
105 data. The costs for hospitalizations occurring outside our center will be imputed based on the  
106 mean costs for a hospital day at CMHH observed in our sample. Clinic costs for comprehensive  
107 care will be estimated using the total expenditures of the High-Risk Children's Clinic. Costs for

108 outpatient services provided in our center but outside the HRCC (such as diagnostic imaging  
109 tests) will be calculated using the standard RVU-based method. The costs for the  
110 comprehensive care with inpatient consultation group will be augmented by the HRCC  
111 personnel time cost for providing inpatient consultation based on the HRCC staff salary and  
112 fringe data. All costs will be inflated to the year of analysis based on the Consumer Price Index  
113 for medical services.<sup>5</sup> The investigators will consider the program to be highly cost-effective if it  
114 reduces the total number of hospital days per child-year without increasing costs, reduces costs  
115 without increasing the total number of hospital days per child-year, or reduces both.

116 **Statistical and Economic Analyses.** All intent-to-treat statistical and economic analyses will be  
117 performed using multilevel generalized estimating equations (GEE) models with exchangeable  
118 correlation to account for family clustering, robust standard errors, and log link. The economic  
119 analyses will be performed according to current standards for such analyses.<sup>6-9</sup> Differences in  
120 hospital days and costs between treatment groups will be assessed using GEE models with  
121 gamma distribution. Rates of secondary outcomes will be assessed using binomial GEE models,  
122 whereas total number of secondary outcomes will be assessed with negative binomial GEE  
123 models. All the models will be adjusted for the trial's stratifying variables (assigned provider  
124 and baseline clinical risk) and for within-family correlation. In this small pilot study, some  
125 treatment effects that would be considered important by family members and clinicians  
126 (reduced hospital days) may not be statistically significant. As a result, Bayesian analyses will  
127 be performed to estimate the probability of a benefit of a given magnitude and evaluate  
128 whether further study is justified. Neutral and skeptical priors will be used. The study will also  
129 allow us to obtain the experience and data needed to refine the process for providing inpatient  
130 consultations for high-risk chronically ill children. All frequentist statistical analyses will be  
131 performed using Stata version 13.1 (Stata Corp, College Station, TX). The Bayesian model will  
132 be implemented using OpenBUGS.

133 **Stopping Rules.** We plan to enroll patients in the pilot trial for 3 years. However, under  
134 predefined stopping rules, enrollment will cease if Bayesian analyses performed at the end of  
135 the first year identifies a 80% or greater probability that inpatient consultation reduces the  
136 total number of hospital days per child-year relative to usual inpatient care. This analysis will

137 use a neutral prior centered at RR of 1.0 with 95% prior interval of 0.3-3.3.

138 **Ethics and Trial Registration.** The Committee for the Protection of Human Subjects (CPHS) at  
139 The University of Texas Health Science Center at Houston (UTHealth) determined that this  
140 Quality Improvement (QI) Project does not require Institutional Review Board (IRB) approval.  
141 This study is registered at ClinicalTrials.org (ID: NCT02870387).

142

143

## References

- 144
- 145
- 146 1. Homer CJ, Klatka K, Romm D, et al. A review of the evidence for the medical home for  
147 children with special health care needs. *Pediatrics*. Oct 2008;122(4):e922-937.
- 148 2. Mosquera RA, Avritscher EB, Samuels CL, et al. Effect of an enhanced medical home on  
149 serious illness and cost of care among high-risk children with chronic illness: a randomized  
150 clinical trial. *JAMA*. Dec 24-31 2014;312(24):2640-2648.
- 151 3. Jackson GL, Powers BJ, Chatterjee R, et al. The Patient-Centered Medical Home: A  
152 Systematic Review. *Annals of Internal Medicine*. 2013;158(3):169-178.
- 153 4. US Department of Health and Human Services; Agency for Healthcare Research and Quality.  
154 CAPHS: surveys and tools to advance patient-centered care. <http://www.CAHPs.AHRQ.gov>.  
155 Accessed July 29, 2016.
- 156 5. U.S. Department of Labor. Bureau of Labor Statistics. Consumer Price Indexes. Accessible  
157 at <http://www.bls.gov/cpi/home.htm>
- 158 6. Drummond MF, Sculpher MJ, Torrance GW, et al. Methods for the Economic Evaluation of  
159 Health Care Programmes. 3rd ed. New York, NY: Oxford University Press; 2005.
- 160 7. Gold MR, Siegel JE, Russell LB, Weinstein MC. Cost-Effectiveness in Health and  
161 Medicine. New York, NY: Oxford University Press;1996.
- 162 8. Siegel JE, Weinstein MC, Russell LB, Gold MR. Recommendations for reporting cost-  
163 effectiveness analyses. Panel on Cost-Effectiveness in Health and  
164 Medicine. *JAMA* 1996; 276: 1339–1341.
- 165 9. Sanders GD, Neumann PJ, Basu A, Brock DW, Feeny D, Krahn M, Kuntz KM, Meltzer DO,  
166 Owens DK, Prosser LA, Salomon JA, Sculpher MJ, Trikalinos TA, Russell LB, Siegel JE, Ganiats  
167 TG. Recommendations for Conduct, Methodological Practices, and Reporting of Cost-  
168 effectiveness Analyses: Second Panel on Cost-Effectiveness in Health and Medicine. *JAMA*.  
169 2016 Sep 13;316(10):1093-103. doi: 10.1001/jama.2016.12195. PubMed ID: 27623463
- 170
- 171
