# Supplementary material
Source: PubMed Central journal article supplement (PMC7783544)
Supplement: jamapediatr-e205026-s003.pdf [file jamapediatr-e205026-s003.pdf]

## **Data Sharing Statement**

Mosquera. Hospital Consultation From Outpatient Clinicians for Medically Complex Children. *JAMA Pediatr*. Published November 30, 2020. 10.1001/jamapediatrics.2020.5026

### **Data**

**Data available:** No
